# Supplementary material for: Codon optimization, expression in Escherichia coli, and immunogenicity analysis of deformed wing virus (DWV) structural protein
Source: PeerJ. 2020 Mar 11;8:e8750. doi: 10.7717/peerj.8750 (PMC7071823; doi:10.7717/peerj.8750)
Supplement: Supplemental Information 7 [file peerj-08-8750-s007.xlsx]

## Sheet: Sheet1
The qRT-PCR data of Virus-only group
Sample	Ct (DWV virus)	Ct (β-actin)	ΔCt=Ct(DWV)-Ct(β-actin)
1	15.43	15.02	0.41
2	16.11	15.09	1.02
3	15.27	15.13	0.14
4	15.49	14.91	0.58
5	15.86	15.17	0.69
The qRT-PCR data of Virus+anti-roVP1-antisera group
Sample	Ct (DWV virus)	Ct (β-actin)	ΔCt
1	15.85	15.24	0.61
2	16.92	15.06	1.86
3	17.11	15.08	2.03
4	16.93	15.01	1.92
5	17.41	15.05	2.36
The qRT-PCR data of Virus+anti-roVP2-antisera group
Sample	Ct (DWV virus)	Ct (β-actin)	ΔCt
1	17.1	15.1	2
2	16.85	15.06	1.79
3	17.29	15.43	1.86
4	17.73	15.04	2.69
5	16.8	15.27	1.53
The qRT-PCR data of Virus+anti-roVP3-antisera group
Sample	Ct (DWV virus)	Ct (β-actin)	ΔCt
1	17.3	15.08	2.22
2	17.82	15.16	2.66
3	17.82	15.02	2.8
4	17.66	15.23	2.43
5	17.57	15.1	2.47
The qRT-PCR data of Virus+anti-DWV-antisera group
Sample	Ct (DWV virus)	Ct (β-actin)	ΔCt
1	18.94	15.09	3.85
2	18.13	15.04	3.09
3	18.33	15.15	3.18
4	19.27	15.11	4.16
5	17.54	15.08	2.46
The qRT-PCR data of five antisera group
Sample	Ct (DWV virus)	Ct (β-actin)	ΔCt
1	40	15.06	24.94
2	40	15.03	24.97
3	40	15.08	24.92
4	40	15.19	24.81
5	40	15.12	24.88
